# Supplementary material for: Formation and destruction of the guanine quartet in solution observed by cold-spray ionization mass spectrometryElectronic supplementary information available: CSI and ESI mass spectra of dG, dC, dA and dT, and schematic diagram of the coldspray ion source. See http://www.rsc.org/suppdata/cc/b2/b212432g/
Source: Royal Society of Chemistry journal article supplement (doi:10.1039/b212432g), 2003-02-17
Supplement: b212432g.pdf [file b212432g.pdf]

# Supplementary Information

## Formation and Destruction of the Guanine Quartet in Solution Observed by Coldspray Ionization Mass Spectrometry

Shigeru Sakamoto, Kazuhiko Nakatani, Isao Saito, and  
Kentaro Yamaguchi\*

*Chemical Analysis Center, Chiba University, Yayoi-cho, Inage-ku, Chiba 263-8522, Japan, Department of Synthetic Chemistry and Biochemistry, and Faculty of Engineering, Kyoto University, Kyoto 606-8501, Japan, and CREST, Japan Science and Technology Corporation (JST)*

*e-mail: yamaguchi@cac.chiba-u.ac.jp*

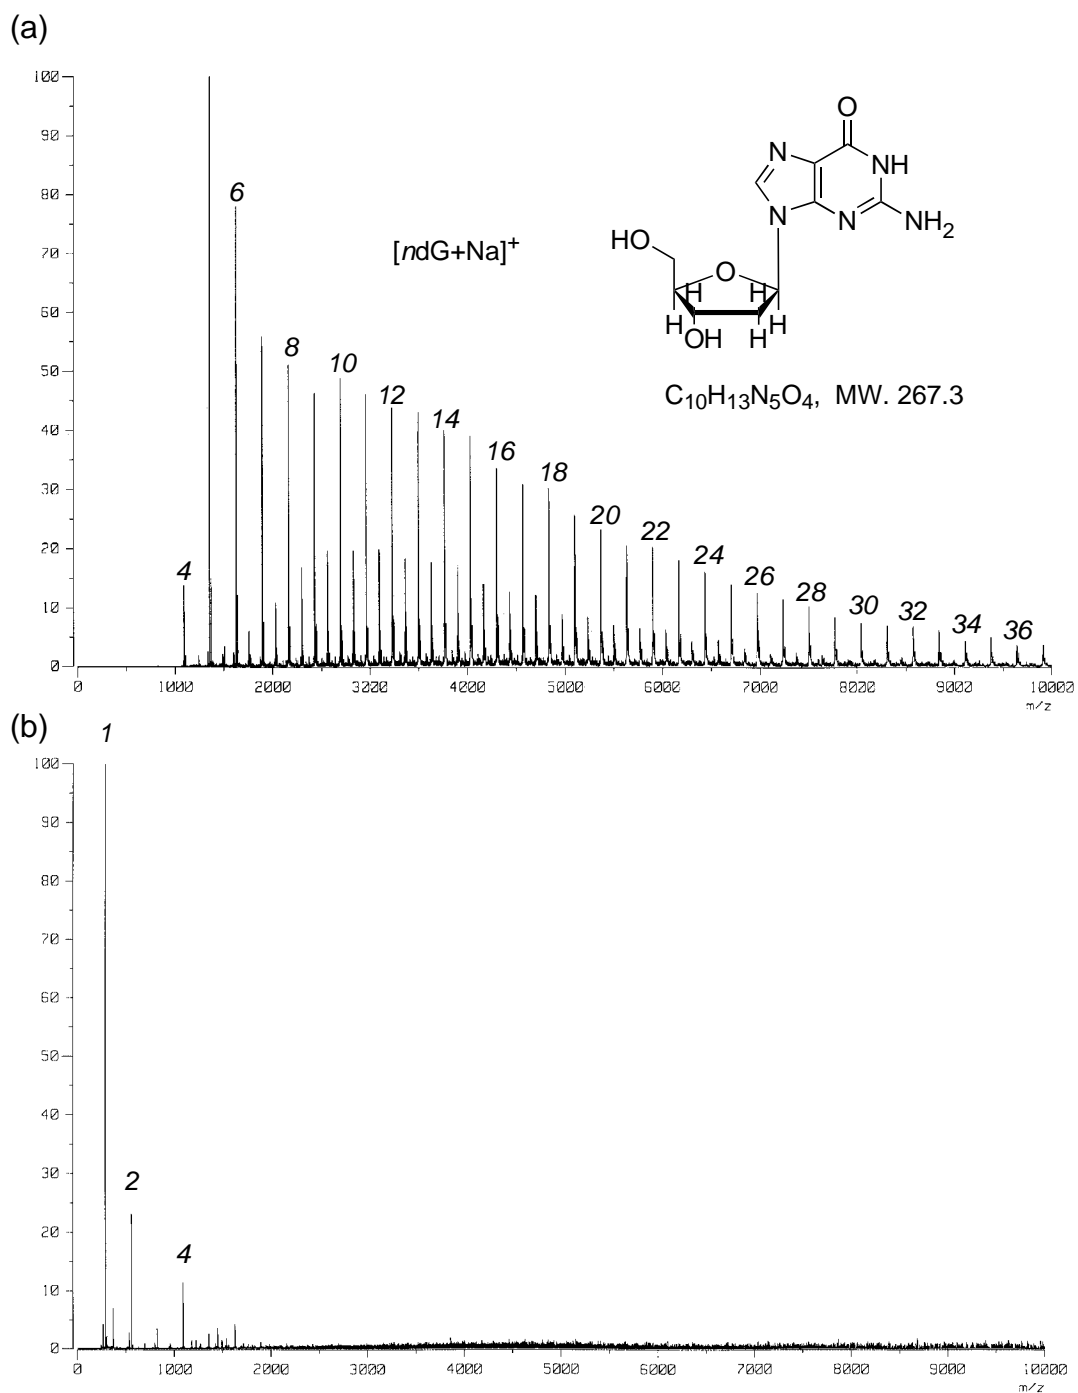

Figure S1 (a) CSI and (b) ESI-MS spectra of dG.

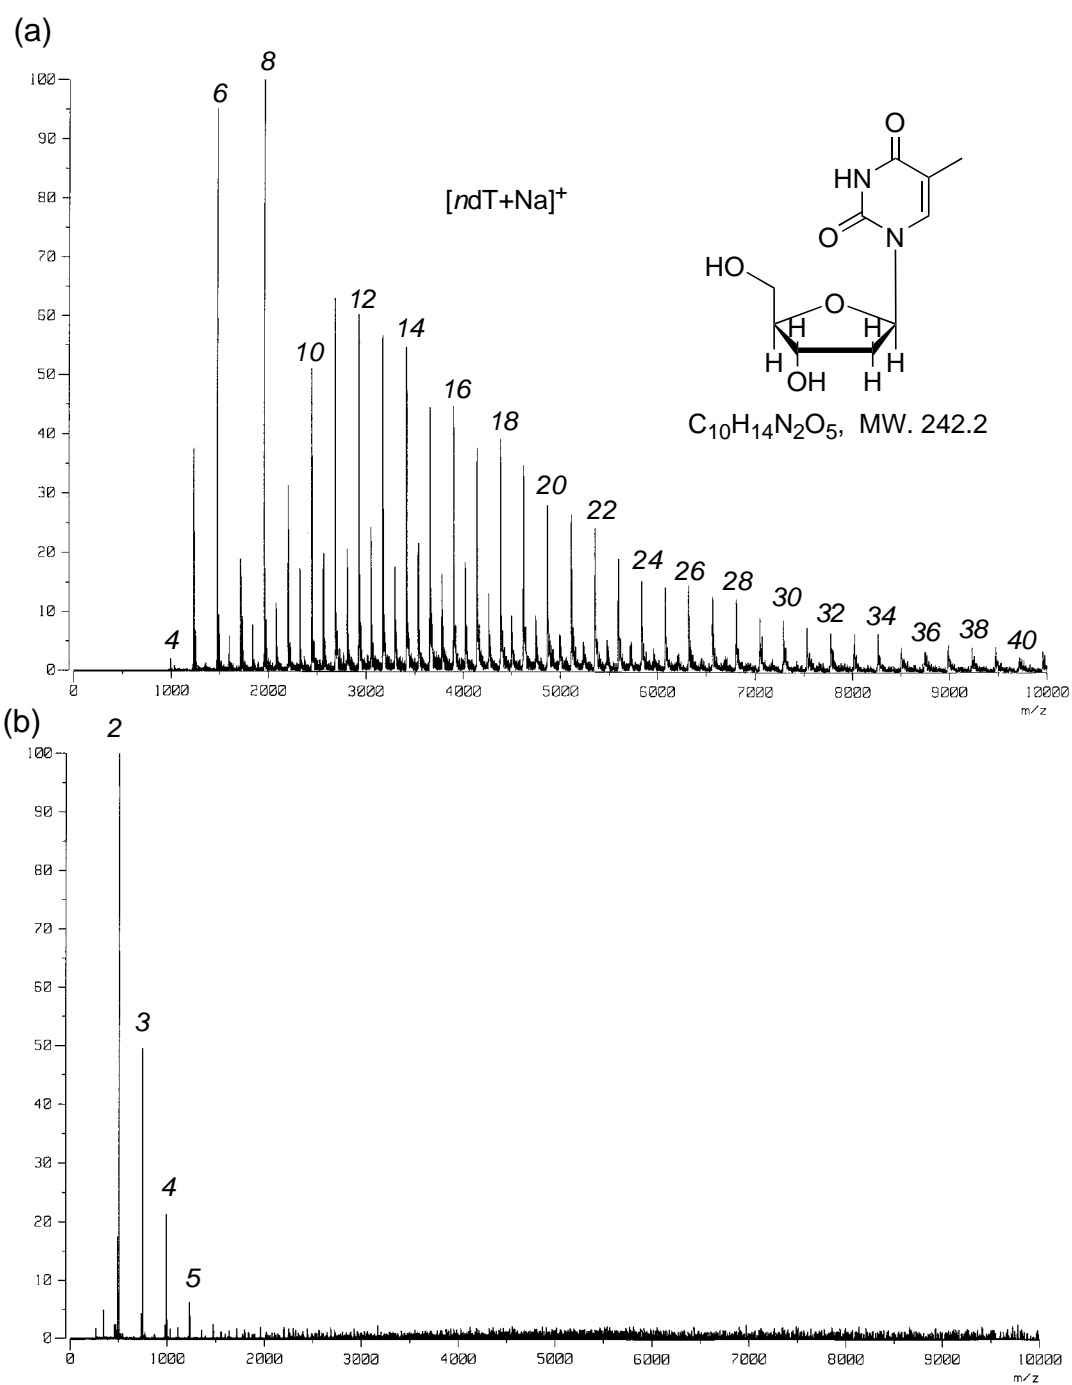

Figure S2 (a) CSI and (b) ESI-MS spectra of dT.

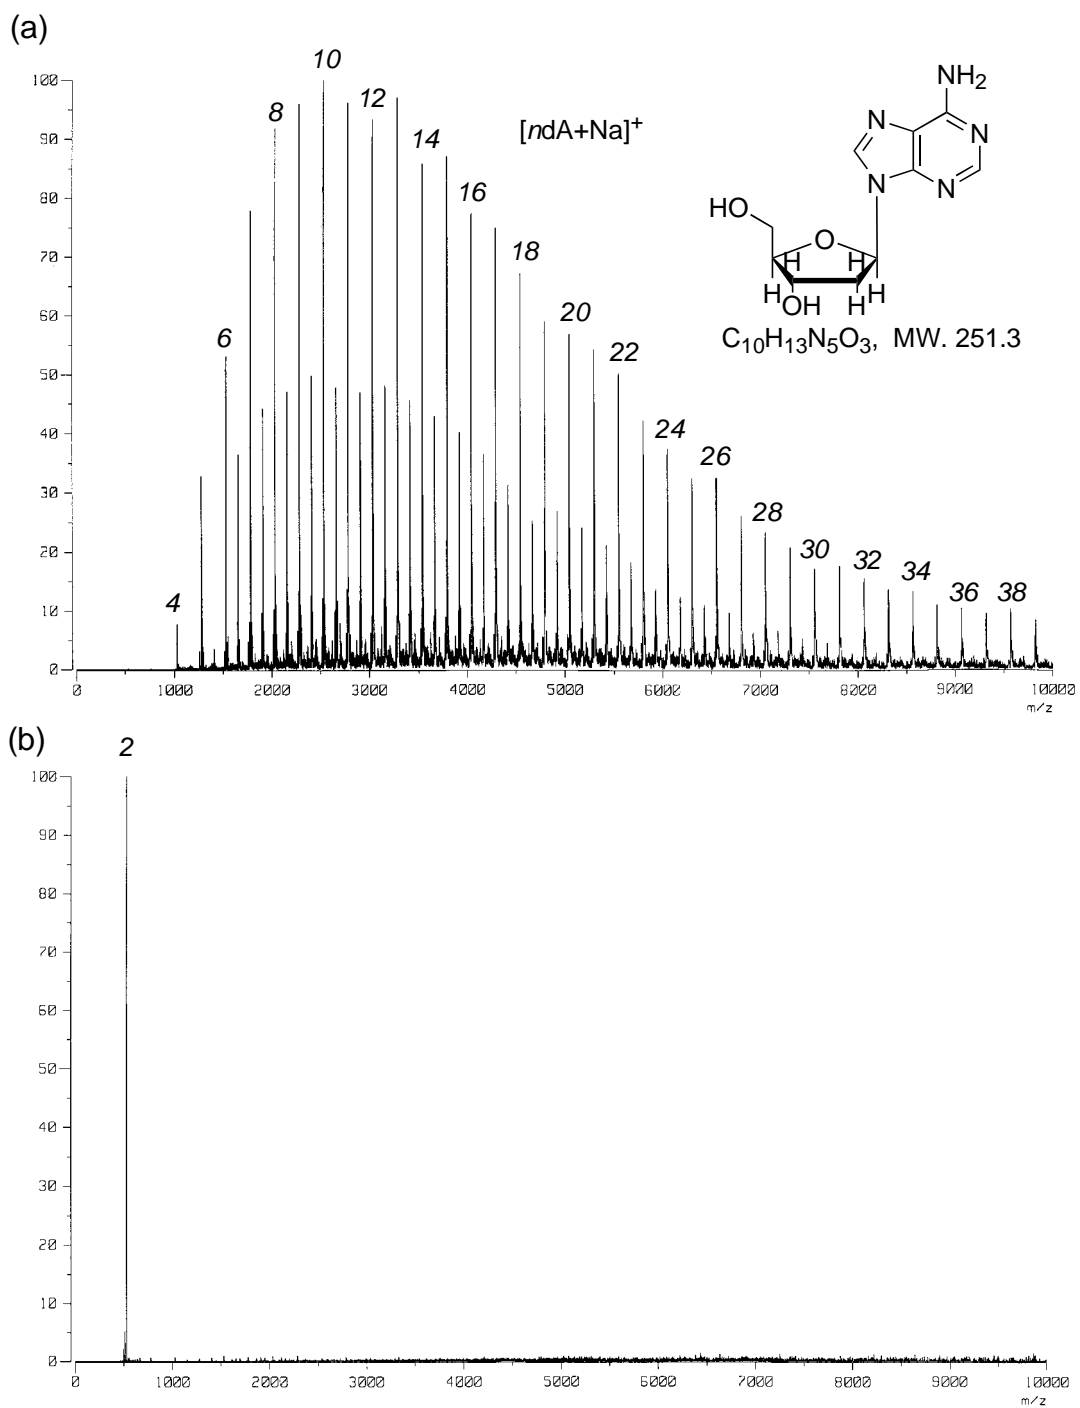

Figure S3 (a) CSI and (b) ESI-MS spectra of dA.

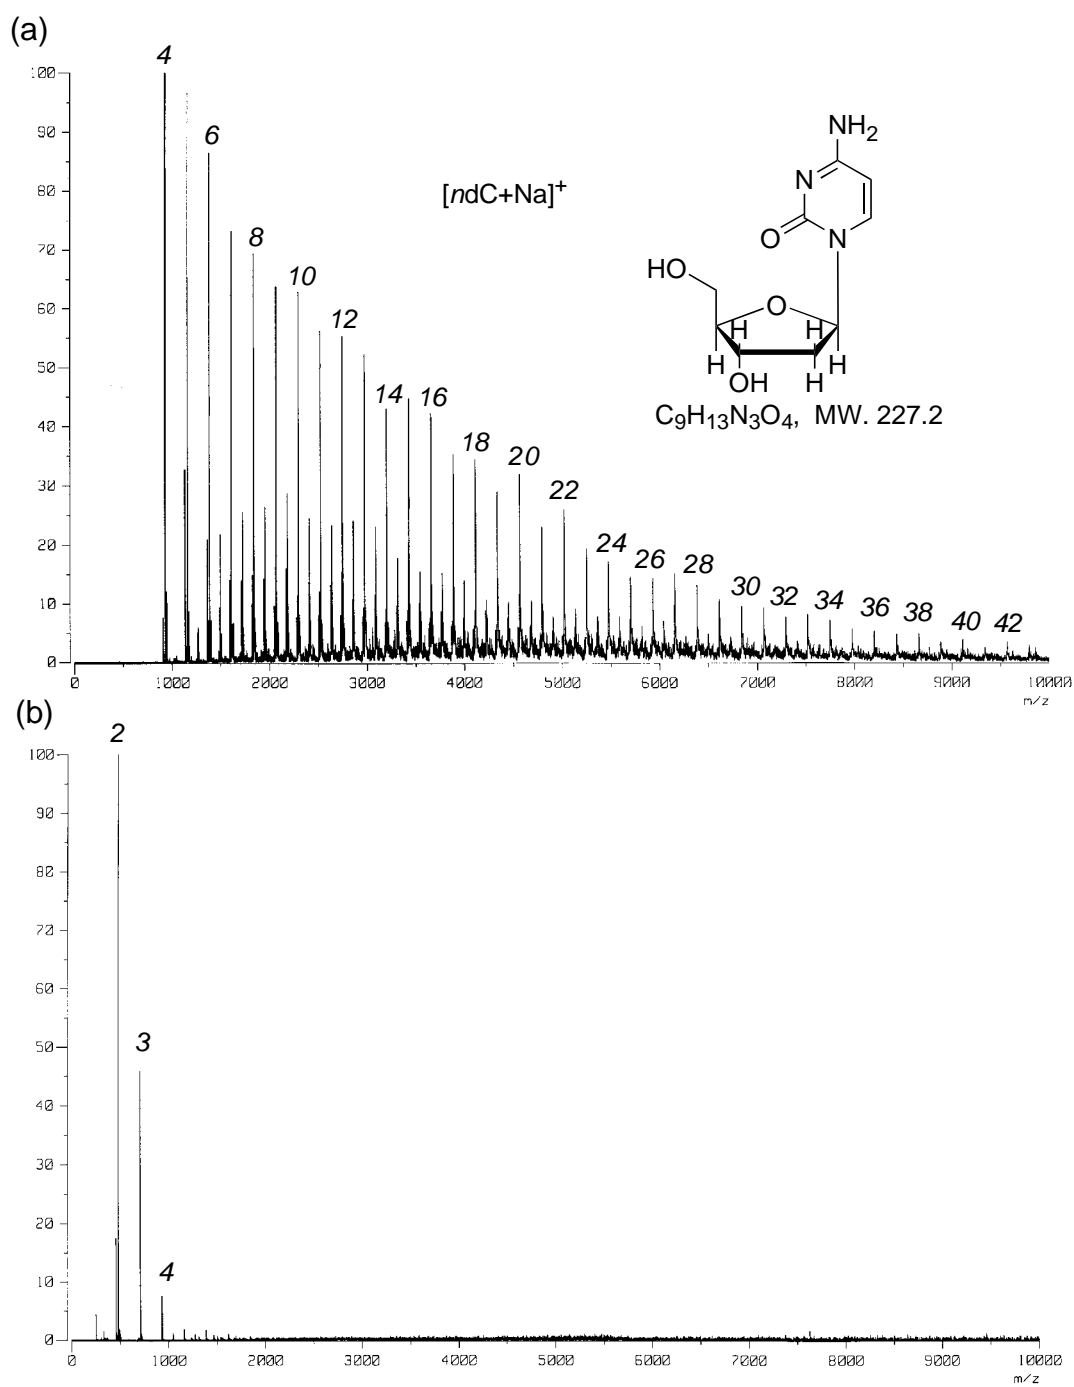

Figure S4 (a) CSI and (b) ESI-MS spectrum of dC.

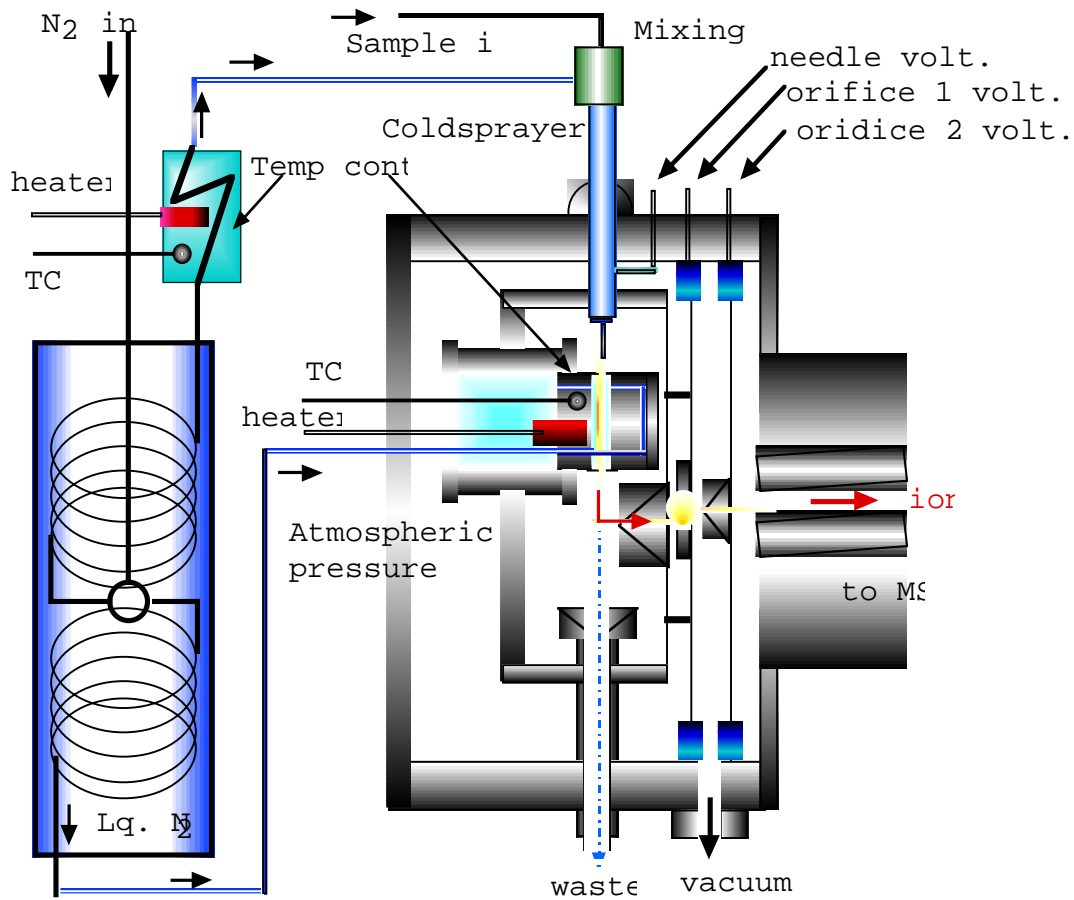

Figure S5. Schematic diagram of the coldspray ion source.
